# Supplementary material for: Seasonal variations in biomass, height, photosynthetic efficiency, and carbon and nitrogen contents of Suaeda japonica in Incheon salt marshes (Korea)
Source: Frontiers journal article supplement (doi:10.3389/fpls.2025.1513624), 2025-03-11
Supplement: Table_1.pdf [file Table_1.pdf]

## Supplementary Tables

Supplementary table 1.

Results of three-way ANOVA examining the effects of plant parts (roots, stems and leaves), research sites (Yeongjong and Sorae) and seasons (spring, summer and autumn) on plant weight, carbon content and nitrogen content. This statistical analysis was performed using SPSS Statistics 25.3.3 (IBM, Armonk, NY, USA).

| Variable                | Factor               | F        | p-value |
|-------------------------|----------------------|----------|---------|
| <b>Weight</b>           | site                 | 31.761   | <0.001  |
|                         | season               | 207.959  | <0.001  |
|                         | part                 | 147.791  | <0.001  |
|                         | site * season        | 41.850   | <0.001  |
|                         | site * part          | 7.429    | <0.001  |
|                         | season * part        | 44.230   | <0.001  |
|                         | site * season * part | 7.404    | <0.001  |
| <b>Carbon content</b>   | site                 | 5.092    | 0.025   |
|                         | season               | 335.874  | <0.001  |
|                         | part                 | 5222.953 | <0.001  |
|                         | site * season        | 64.856   | <0.001  |
|                         | site * part          | 2.235    | 0.108   |
|                         | season * part        | 96.242   | <0.001  |
|                         | site * season * part | 34.596   | <0.001  |
| <b>Nitrogen content</b> | site                 | 110.464  | <0.001  |
|                         | season               | 287.739  | <0.001  |
|                         | part                 | 1434.584 | <0.001  |
|                         | site * season        | 18.636   | <0.001  |
|                         | site * part          | 39.408   | <0.001  |
|                         | season * part        | 5.443    | <0.001  |
|                         | site * season * part | 27.783   | <0.001  |
